# Supplementary material
Source: PubMed Central journal article supplement (PMC240734)

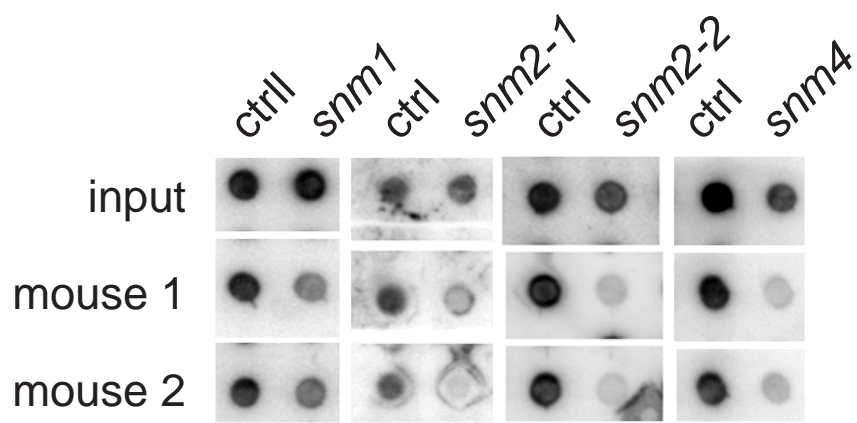

Supplement: pnas_100_22_13001__4.pdf [file pnas_100_22_13001__4.pdf]

WT

*snm4*

lung

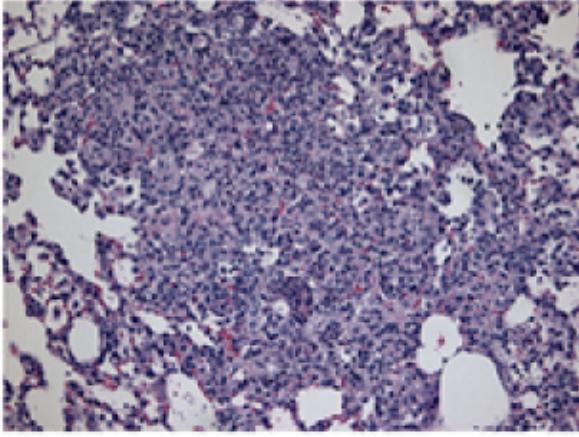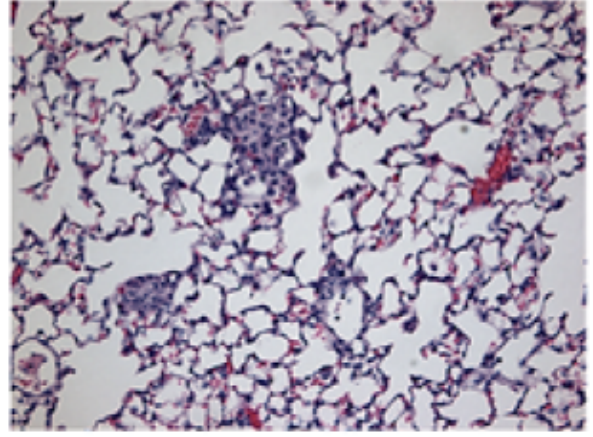

spleen

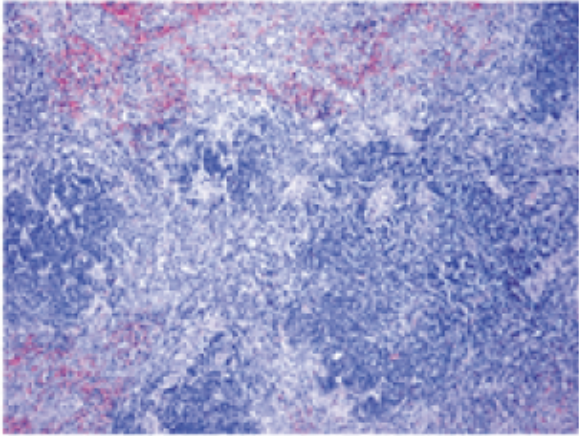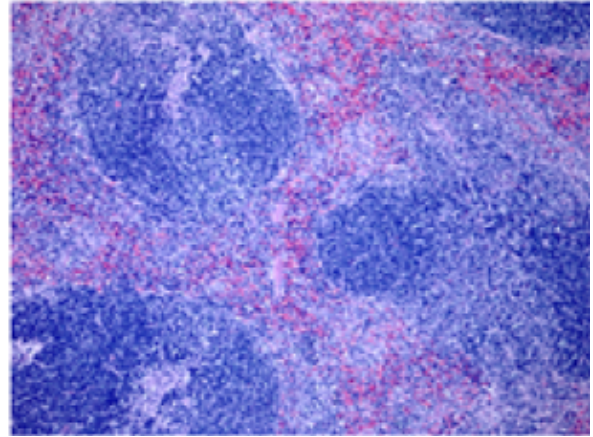

Supplement: pnas_100_22_13001__6.pdf [file pnas_100_22_13001__6.pdf]
